# Supplementary material
Source: publisher figshare collection journal article supplement (https://frontiersin.figshare.com/ndownloader/files/31777262)
Supplement: Supplementary file 1 [file 31777262]

| **P-Nr.** | **Depth (cm)** | **F14C** | **Error** | **14C Age**  **(Conventional; yr BP)** | **Material dated** |
| --- | --- | --- | --- | --- | --- |
| 22608 | 3-4 | 0.6546 | 0.0014 | 3404 ± 17 | Shells (Gastropods) |
| 16516 | 6-7 | 1.2211 | 0.0019 | -1605 ± 13 (modern age) | Shell (Bivalve) |
| 22609 | 11-12 | 1.2421 | 0.0021 | -1742 ± 14 (modern age) | Shell (Bivalve) |
| 22610 | 23-24 | 0.7030 | 0.0015 | 2831 ± 17 | Shells (Gastropods) |
| 22612 | 34-35 | 0.9281 | 0.0018 | 599 ± 16 | Shells (Gastropods) |
| 16284 | 36-37 | 0.6929 | 0.0047 | 2947 ± 55 | Shells (Gastropods) |
| 16283 | 51-52 | 0.6711 | 0.0036 | 3204 ± 43 | Shells (Gastropods) |
| 22613 | 54-55 | 0.6009 | 0.0015 | 4091 ± 20 | Shells (Gastropods) |
| 16578 | 67-68 | 0.5795 | 0.0012 | 4383 ± 17 | Shells (Gastropods) |
| 16282 | 82-83 | 0.4968 | 0.0029 | 5620 ± 47 | Shells (Gastropods) |
| 16579 | 82-83 | 0.5645 | 0.0012 | 4593 ± 17 | Shells (Gastropods) |
| 22614 | 84-85 | 0.5899 | 0.0014 | 4240 ± 19 | Shells (Gastropods) |
| 22615 | 93-94 | 0.5330 | 0.0013 | 5055 ± 20 | Shells (Gastropods) |
| 22616 | 96-97 | 0.4886 | 0.0012 | 5753 ± 20 | Shells (Gastropods) |
| 16281 | 101-102 | 0.4744 | 0.0028 | 5990 ± 48 | Shells (Gastropods) |

Supplementary Table S2: 14C dates of Panama Lagoon
